# Supplementary material for: Earthquake-induced debris flows at Popocatépetl Volcano, Mexico
Source: Copernicus journal article supplement (doi:10.5194/esurf-9-393-2021), 2021-05-21
Supplement: Supplementary file 1 [file esurf-9-393-2021-supplement.zip]

Archive with 2 entries (2 files):
- esurf-2020-36_suppl.kmz
- esurf-9-393-2021-supplement-title-page.pdf
