# Supplementary material for: Earthquake-induced debris flows at Popocatépetl Volcano, Mexico
Source: Copernicus journal article supplement (doi:10.5194/esurf-9-393-2021), 2021-05-21
Supplement: Supplementary file 1 [file esurf-9-393-2021-supplement.zip › esurf-9-393-2021-supplement-title-page.pdf]

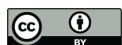

## *Supplement of*

# **Earthquake-induced debris flows at Popocatépetl Volcano, Mexico**

**Velio Coviello et al.**

*Correspondence to:* Velio Coviello ([velio.coviello@unibz.it](mailto:velio.coviello@unibz.it))

- [esurf-9-393-2021-supplement-title-page.pdf](#)
- [esurf-2020-36\\_suppl.kmz](#)

The copyright of individual parts of the supplement might differ from the article licence.
